# Supplementary material
Source: Elsevier journal article supplement (https://www.sciencedirect.com/science/article/pii/S0122726219300680)
Supplement: mmc1 [file S0122726219300680:mmc1.docx]

**Anexo 1**

**KMO y prueba de Bartlett**

| Medida de adecuación muestral de Kaiser-Meyer-Olkin. | | ,544 |
| --- | --- | --- |
| Prueba de esfericidad de Bartlett | Chi-cuadrado aproximado | 95,843 |
| gl | 21 |
| Sig. | ,000 |

**Comunalidades**

|  | Inicial | Extracción |
| --- | --- | --- |
| Ventilación artificial mecánica (VAM) | 1,000 | ,396 |
| Presencia de infección intrahospitalaria | 1,000 | ,668 |
| Presencia de tratamiento quirúrgico | 1,000 | ,652 |
| Presencia de nutrición parenteral | 1,000 | ,324 |
| Diagnóstico de sepsis | 1,000 | ,476 |
| Edad de riesgo de más de 65 años | 1,000 | ,795 |
| Diagnóstico neurológico | 1,000 | ,581 |

Método de extracción: Análisis de Componentes principales.

**Varianza total explicada**

| Componente | Autovalores iniciales | | | Sumas de las saturaciones al cuadrado de la extracción | | | Suma de las saturaciones al cuadrado de la rotación | | |
| --- | --- | --- | --- | --- | --- | --- | --- | --- | --- |
|  | Total | % de la varianza | % acumulado | Total | % de la varianza | % acumulado | Total | % de la varianza | % acumulado |
| 1 | 1,616 | 23,092 | 23,092 | 1,616 | 23,092 | 23,092 | 1,578 | 22,543 | 22,543 |
| 2 | 1,253 | 17,907 | 40,998 | 1,253 | 17,907 | 40,998 | 1,258 | 17,971 | 40,514 |
| 3 | 1,021 | 14,586 | 55,584 | 1,021 | 14,586 | 55,584 | 1,055 | 15,071 | 55,584 |
| 4 | ,954 | 13,635 | 69,220 |  |  |  |  |  |  |
| 5 | ,849 | 12,126 | 81,345 |  |  |  |  |  |  |
| 6 | ,736 | 10,515 | 91,860 |  |  |  |  |  |  |
| 7 | ,570 | 8,140 | 100,000 |  |  |  |  |  |  |

Método de extracción: Análisis de Componentes principales.

**Anexo 2.**

**Matriz de componentes rotados(a)**

|  | Componente | | |
| --- | --- | --- | --- |
| 1 | 2 | 3 |
| Ventilación artificial mecánica (VAM) | -,625 | ,061 | ,035 |
| Presencia de infección intrahospitalaria | ,184 | ,744 | ,283 |
| Presencia de tratamiento quirúrgico | ,725 | ,350 | -,067 |
| Presencia de nutrición parenteral | ,566 | ,009 | -,060 |
| Diagnóstico de sepsis | ,522 | -,279 | ,354 |
| Edad de riesgo de más de 65 años | -,137 | ,022 | ,881 |
| Diagnóstico neurológico | -,131 | ,707 | -,254 |

Método de extracción: Análisis de componentes principales.

Método de rotación: Normalización Varimax con Kaiser.

a La rotación ha convergido en 5 iteraciones.

**Anexo 3.**

**Resumen de los modelos**

| Paso | -2 log de la verosimilitud | R cuadrado de Cox y Snell | R cuadrado de Nagelkerke |
| --- | --- | --- | --- |
| 1 | 251,718(a) | ,189 | ,253 |

a La estimación ha finalizado en el número de iteración 4 porque las estimaciones de los parámetros han cambiado en menos de ,001.

**Tabla de clasificación(a)**

|  | Observado | | Pronosticado | | |
| --- | --- | --- | --- | --- | --- |
|  |  | | Estado nutricional al egreso | | Porcentaje correcto |
|  |  | | Ausencia de desnutrición al egreso | Presencia de desnutrición al egreso | Ausencia de desnutrición al egreso |
| Paso 1 | Estado nutricional al egreso | Ausencia de desnutrición al egreso | 86 | 20 | 81,1 (Especificidad) |
|  |  | Presencia de desnutrición al egreso | 39 | 69 | 63,9 (Sensibilidad) |
|  | Porcentaje global | |  |  | **72,4** |

a El valor de corte es ,500

**Variables en la ecuación**

|  | | B | E.T. | Wald | gl | Sig. | Exp(B) | I.C. 95,0% para EXP(B) | |
| --- | --- | --- | --- | --- | --- | --- | --- | --- | --- |
| Inferior | Superior |
| Paso 1(a) | vam | 1,090 | ,348 | 9,801 | 1 | ,002 | 2,976 | 1,503 | 5,890 |
| diagnost1 | 1,976 | ,431 | 21,004 | 1 | ,000 | 7,212 | 3,098 | 16,789 |
| ttoquierur | 1,004 | ,338 | 8,831 | 1 | ,003 | 2,729 | 1,407 | 5,291 |
| tiponutric2 | ,334 | ,369 | ,819 | 1 | ,366 | 1,397 | ,677 | 2,881 |
| Constante | -1,694 | ,382 | 19,685 | 1 | ,000 | ,184 |  |  |

a Variable(s) introducida(s) en el paso 1: vam, diagnost1, ttoquierur, tiponutric2.
